# Supplementary material
Source: PubMed Central journal article supplement (PMC3384431)
Supplement: neo1405_0440SD1.pdf [file neo1405_0440SD1.pdf]

**A**

S2-013

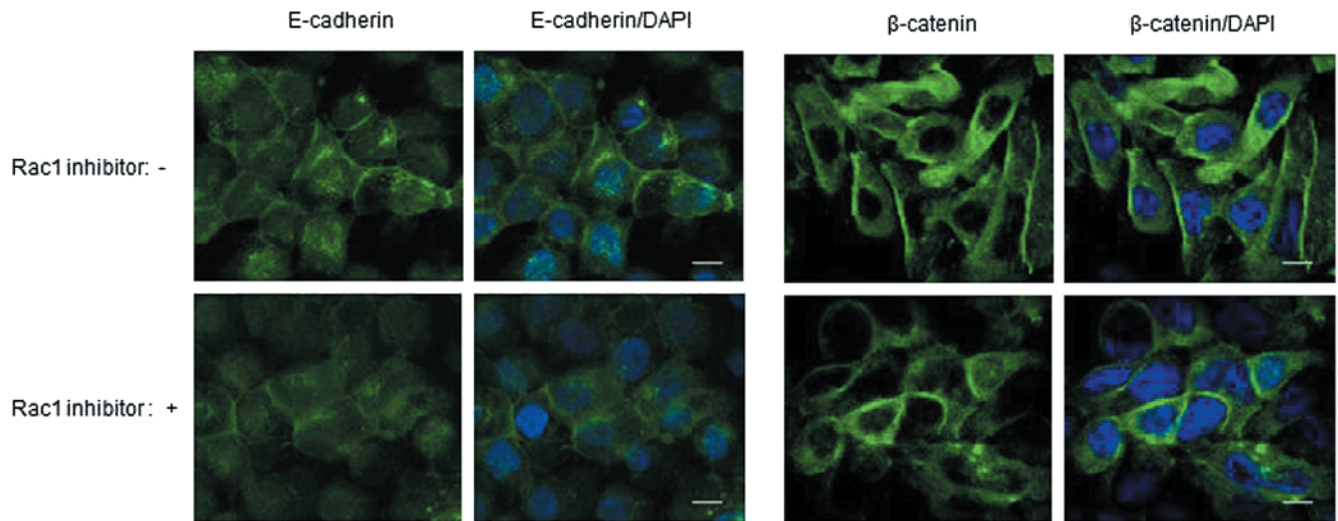**B**

S2-013

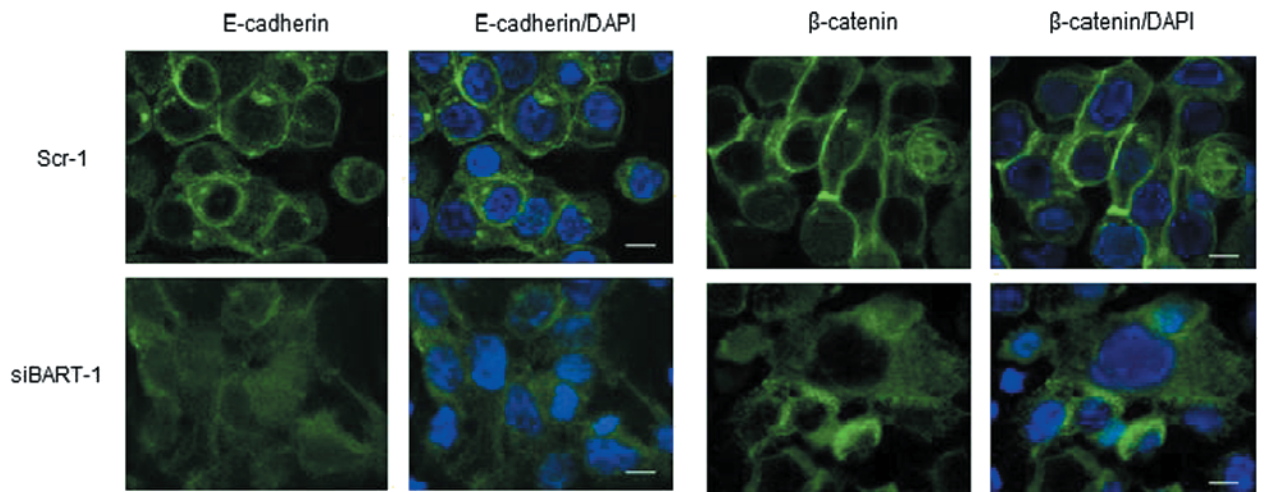

**Figure W1.** BART functions in regulation of the stability of cell-cell contacts in a Rac1-independent manner. (A) S2-013 cells were pre-treated with or without the Rac1 inhibitor (NSC23766), and immunocytochemical staining was performed using anti-E-cadherin and anti- $\beta$ -catenin antibodies (green). Blue indicates DAPI staining. Bars, 10  $\mu$ m. (B) Representative E-cadherin and  $\beta$ -catenin staining (green) in scrambled control (Scr-1) and BART RNAi (siBART-1) S2-013 cells. Blue indicates DAPI staining. Bars, 10  $\mu$ m.
